# Supplementary material
Source: publisher figshare collection journal article supplement (https://acs.figshare.com/ndownloader/files/4293034)
Supplement: Supplementary file 1 [file 4293034]

data_General
_audit_creation_date                  '2008-01-17'
_audit_creation_method                'by CrystalStructure 3.8'
_audit_update_record                   ?

#==============================================================================

# PROCESSING SUMMARY (IUCr Office Use Only)

_journal_date_recd_electronic     ?
_journal_date_from_coeditor       ?
_journal_date_accepted            ?
_journal_coeditor_code            ?

#==============================================================================

# SUBMISSION DETAILS

_publ_contact_author_name             'ENTER NAME'
_publ_contact_author_email            'ENTER EMAIL ADDRESS'
_publ_contact_author_fax              'ENTER FAX NUMBER'
_publ_contact_author_phone            'ENTER PHONE NUMBER'
_publ_contact_letter
;
    ENTER TEXT OF LETTER
;
_publ_requested_journal               'ENTER JOURNAL NAME HERE'
_publ_requested_category              'CHOOSE FI FM FO CI CM CO or AD'
_publ_requested_coeditor_name          ?

#==============================================================================

# TITLE AND AUTHOR LIST

_publ_section_title
;
    ENTER SECTION TITLE
;
_publ_section_title_footnote
;
    ENTER FOOTNOTE TO TITLE OF PAPER
;
loop_
_publ_author_name
_publ_author_footnote
_publ_author_address
' FIRST AUTHORS NAME '
;
  FIRST AUTHORS FOOTNOTES
;
;
  FIRST AUTHORS ADDRESS
;
_publ_section_synopsis
;
  ENTER SYNOPSIS
;

#==============================================================================

# TEXT

_publ_section_abstract
;
    ENTER ABSTRACT
;
_publ_section_comment
;
    ENTER TEXT
;
_publ_section_references
;
    ENTER OTHER REFERENCES

    Rigaku/MSC and Rigaku Corporation. (2006).
    CrystalStructure (Version 3.8). 
    Single Crystal Structure Analysis Software.
    Rigaku/MSC, 9009 TX, USA 77381-5209.
    Rigaku, Tokyo 196-8666, Japan.

    Carruthers, J.R., Rollett,J.S., Betteridge, P.W.,
	 Kinna, D., Pearce, L., Larsen, A., and Gabe, E.(1999)
    CRYSTALS Issue 11, Chemical Crystallography Laboratory, Oxford, UK.

    Larson, A. C. (1970), Crystallographic Computing, 291-294.
    ed F. R. Ahmed, Munksgaard, Copenhagen.

;
_publ_section_figure_captions
;
    ENTER FIGURE CAPTIONS
;
_publ_section_exptl_prep
;
    ENTER COMPOUND PREPARATION DETAILS
;
_publ_section_exptl_refinement
;
    ENTER SPECIAL DETAILS OF THE REFINEMENT
;

#==============================================================================

data__080117

#==============================================================================

# CHEMICAL DATA

_chemical_formula_sum                  'C12 H12 Cl N O3 S '
_chemical_formula_moiety               'C12 H12 Cl N O3 S '
_chemical_formula_weight               285.74
_chemical_melting_point                ?

#==============================================================================

# CRYSTAL DATA
_symmetry_cell_setting                 monoclinic
_symmetry_space_group_name_H-M        'P 1 21/n 1'
_symmetry_space_group_name_Hall       '-P 2yn'
_symmetry_Int_Tables_number            14
loop_
_symmetry_equiv_pos_site_id
_symmetry_equiv_pos_as_xyz
1   '+X,+Y,+Z'
2   '1/2-X,1/2+Y,1/2-Z'
3   '-X,-Y,-Z'
4   '1/2+X,1/2-Y,1/2+Z'

#------------------------------------------------------------------------------

_cell_length_a                         9.31754(17)
_cell_length_b                         11.0378(2)
_cell_length_c                         24.8795(5)
_cell_angle_alpha                      90.0000
_cell_angle_beta                       91.2800(7)
_cell_angle_gamma                      90.0000
_cell_volume                           2558.10(8)
_cell_formula_units_Z                  8
_cell_measurement_reflns_used          17113
_cell_measurement_theta_min            3.6
_cell_measurement_theta_max            68.2
_cell_measurement_temperature          173.1

#------------------------------------------------------------------------------

_exptl_crystal_description            'block'
_exptl_crystal_colour                 'colorless'
_exptl_crystal_size_max                0.60
_exptl_crystal_size_mid                0.50
_exptl_crystal_size_min                0.30
_exptl_crystal_density_diffrn          1.484
_exptl_crystal_density_meas            ?
_exptl_crystal_density_method         'not measured'
_exptl_crystal_F_000                   1184.00
_exptl_absorpt_coefficient_mu          4.185
_exptl_absorpt_correction_type         multi-scan
_exptl_absorpt_process_details         
;
    Higashi, T. (1995). Program for Absorption Correction.
    Rigaku Corporation, Tokyo, Japan.
;
_exptl_absorpt_correction_T_min        0.231
_exptl_absorpt_correction_T_max        0.285

#==============================================================================

# EXPERIMENTAL DATA

_diffrn_radiation_type                'Cu K\a'
_diffrn_radiation_wavelength           1.54187
_diffrn_measurement_device_type       'Rigaku RAXIS-RAPID'
_diffrn_measurement_method             \w
_diffrn_detector_area_resol_mean       10.00
_diffrn_reflns_number                  24998
_diffrn_reflns_av_R_equivalents        0.058
_diffrn_reflns_theta_max               68.25
_diffrn_measured_fraction_theta_max    0.996
_diffrn_reflns_theta_full              68.25
_diffrn_measured_fraction_theta_full   0.996
_diffrn_reflns_limit_h_min             -11
_diffrn_reflns_limit_h_max             11
_diffrn_reflns_limit_k_min             -13
_diffrn_reflns_limit_k_max             13
_diffrn_reflns_limit_l_min             -29
_diffrn_reflns_limit_l_max             29

#==============================================================================

# REFINEMENT DATA

_refine_special_details
;
    Refinement was performed using all reflections. The weighted 
    R-factor (wR) and goodness of fit (S) are based on F^2^.
    R-factor (gt) are based on F. The threshold expression of
    F^2^ > 2.0 sigma(F^2^) is used only for calculating R-factor (gt).
;
_reflns_number_total                   4669
_reflns_number_gt                      3488
_reflns_threshold_expression           F^2^>2.0\s(F^2^)
_refine_ls_structure_factor_coef       Fsqd
_refine_ls_R_factor_gt                 0.0468
_refine_ls_wR_factor_ref               0.1304
_refine_ls_hydrogen_treatment          mixed
_refine_ls_number_reflns               4669
_refine_ls_number_parameters           404
_refine_ls_goodness_of_fit_ref         1.227
_refine_ls_weighting_scheme            sigma
_refine_ls_weighting_details
'w = 1/\s^2^(Fo^2^)'
_refine_ls_shift/su_max                0.0000
_refine_diff_density_max               0.51
_refine_diff_density_min               -0.41
_refine_ls_extinction_method           
   'Larson (1970) Crystallographic Computing eq. 22'
_refine_ls_extinction_coef             6(7)

loop_
_atom_type_symbol
_atom_type_description
_atom_type_scat_dispersion_real
_atom_type_scat_dispersion_imag
_atom_type_scat_source
  'C' 'C'  0.018 0.009 
;
International Tables for Crystallography
(1992, Vol. C, Tables 4.2.6.8 and 6.1.1.4)
;
  'H' 'H'  0.000 0.000 
;
International Tables for Crystallography
(1992, Vol. C, Table 6.1.1.4)
;
  'O' 'O'  0.049 0.032 
;
International Tables for Crystallography
(1992, Vol. C, Tables 4.2.6.8 and 6.1.1.4)
;
  'N' 'N'  0.031 0.018 
;
International Tables for Crystallography
(1992, Vol. C, Tables 4.2.6.8 and 6.1.1.4)
;
  'Cl' 'Cl'  0.364 0.702 
;
International Tables for Crystallography
(1992, Vol. C, Tables 4.2.6.8 and 6.1.1.4)
;
  'S' 'S'  0.333 0.557 
;
International Tables for Crystallography
(1992, Vol. C, Tables 4.2.6.8 and 6.1.1.4)
;

#==============================================================================

# ATOMIC COORDINATES AND THERMAL PARAMETERS

loop_
_atom_site_label
_atom_site_type_symbol
_atom_site_fract_x
_atom_site_fract_y
_atom_site_fract_z
_atom_site_U_iso_or_equiv
_atom_site_adp_type
_atom_site_occupancy
_atom_site_symmetry_multiplicity
_atom_site_calc_flag
_atom_site_refinement_flags
_atom_site_disorder_assembly
_atom_site_disorder_group
 Cl(1) Cl 0.73205(8) 0.40369(8) 0.97228(3) 0.0316(2) Uani 1.00 1 d . . .
 Cl(2) Cl 0.20904(10) 0.29759(9) 0.96979(4) 0.0470(2) Uani 1.00 1 d . . .
 S(1) S 0.75990(8) 0.59467(8) 0.76837(3) 0.0306(2) Uani 1.00 1 d . . .
 S(2) S 0.27698(8) 0.02631(8) 0.78640(3) 0.0313(2) Uani 1.00 1 d . . .
 O(1) O 1.0955(2) 0.4470(2) 0.83409(8) 0.0310(6) Uani 1.00 1 d . . .
 O(2) O 0.9748(3) 0.7441(2) 0.86239(11) 0.0548(8) Uani 1.00 1 d . . .
 O(3) O 1.1257(2) 0.7200(2) 0.93286(10) 0.0508(8) Uani 1.00 1 d . . .
 O(4) O 0.5969(2) 0.2122(2) 0.84717(9) 0.0295(6) Uani 1.00 1 d . . .
 O(5) O 0.6612(2) 0.0174(2) 0.96210(9) 0.0413(7) Uani 1.00 1 d . . .
 O(6) O 0.5250(2) -0.0484(2) 0.89282(10) 0.0409(7) Uani 1.00 1 d . . .
 N(1) N 0.8888(2) 0.4959(2) 0.87472(9) 0.0221(6) Uani 1.00 1 d . . .
 N(2) N 0.3854(2) 0.1735(2) 0.88552(9) 0.0236(6) Uani 1.00 1 d . . .
 C(1) C 0.6642(3) 0.5502(3) 0.82573(12) 0.0273(8) Uani 1.00 1 d . . .
 C(2) C 0.5152(3) 0.5597(3) 0.82494(14) 0.0321(9) Uani 1.00 1 d . . .
 C(3) C 0.4369(3) 0.5319(3) 0.87006(16) 0.0423(11) Uani 1.00 1 d . . .
 C(4) C 0.5058(3) 0.4877(3) 0.91530(15) 0.0360(9) Uani 1.00 1 d . . .
 C(5) C 0.6533(3) 0.4724(2) 0.91623(12) 0.0243(7) Uani 1.00 1 d . . .
 C(6) C 0.7362(3) 0.5073(2) 0.87241(11) 0.0217(7) Uani 1.00 1 d . . .
 C(7) C 0.8278(3) 0.4497(3) 0.74641(13) 0.0298(8) Uani 1.00 1 d . . .
 C(8) C 0.8795(3) 0.3704(3) 0.79299(12) 0.0271(8) Uani 1.00 1 d . . .
 C(9) C 0.9647(3) 0.4400(2) 0.83451(11) 0.0221(7) Uani 1.00 1 d . . .
 C(10) C 0.9722(3) 0.5607(3) 0.91590(12) 0.0261(8) Uani 1.00 1 d . . .
 C(11) C 1.0220(3) 0.6847(3) 0.89865(13) 0.0306(8) Uani 1.00 1 d . . .
 C(12) C 1.1805(6) 0.8403(4) 0.9247(2) 0.0885(19) Uani 1.00 1 d . . .
 C(13) C 0.1722(3) 0.0887(3) 0.83819(12) 0.0290(8) Uani 1.00 1 d . . .
 C(14) C 0.0246(3) 0.0675(3) 0.83627(15) 0.0369(9) Uani 1.00 1 d . . .
 C(15) C -0.0621(4) 0.1112(4) 0.87640(18) 0.0482(12) Uani 1.00 1 d . . .
 C(16) C -0.0041(3) 0.1786(3) 0.91789(17) 0.0441(11) Uani 1.00 1 d . . .
 C(17) C 0.1419(3) 0.2008(3) 0.91936(13) 0.0343(9) Uani 1.00 1 d . . .
 C(18) C 0.2342(3) 0.1550(3) 0.88092(12) 0.0276(8) Uani 1.00 1 d . . .
 C(19) C 0.3425(3) 0.1636(3) 0.75434(13) 0.0289(8) Uani 1.00 1 d . . .
 C(20) C 0.3842(3) 0.2615(3) 0.79499(12) 0.0279(8) Uani 1.00 1 d . . .
 C(21) C 0.4659(3) 0.2136(2) 0.84363(11) 0.0220(7) Uani 1.00 1 d . . .
 C(22) C 0.4632(3) 0.1361(3) 0.93419(13) 0.0299(9) Uani 1.00 1 d . . .
 C(23) C 0.5627(3) 0.0302(3) 0.93073(13) 0.0323(9) Uani 1.00 1 d . . .
 C(24) C 0.6142(5) -0.1561(4) 0.89105(19) 0.0664(15) Uani 1.00 1 d . . .
 H(1) H 0.475(3) 0.590(2) 0.7904(12) 0.024(8) Uiso 1.00 1 c . . .
 H(2) H 0.342(5) 0.545(4) 0.8694(18) 0.075(14) Uiso 1.00 1 c . . .
 H(3) H 0.455(3) 0.467(2) 0.9448(11) 0.011(6) Uiso 1.00 1 c . . .
 H(4) H 0.752(3) 0.407(2) 0.7224(12) 0.028(8) Uiso 1.00 1 c . . .
 H(5) H 0.908(3) 0.468(2) 0.7236(11) 0.016(7) Uiso 1.00 1 c . . .
 H(6) H 0.803(3) 0.332(2) 0.8108(12) 0.022(8) Uiso 1.00 1 c . . .
 H(7) H 0.940(2) 0.301(2) 0.7795(10) 0.010(6) Uiso 1.00 1 c . . .
 H(8) H 0.915(4) 0.558(3) 0.9473(15) 0.049(11) Uiso 1.00 1 c . . .
 H(9) H 1.060(3) 0.518(2) 0.9269(11) 0.019(7) Uiso 1.00 1 c . . .
 H(10) H 1.1062 0.8899 0.9100 0.105 Uiso 1.00 1 c R . .
 H(11) H 1.2586 0.8382 0.9009 0.105 Uiso 1.00 1 c R . .
 H(12) H 1.2121 0.8726 0.9584 0.105 Uiso 1.00 1 c R . .
 H(13) H -0.011(4) 0.020(3) 0.8034(16) 0.055(11) Uiso 1.00 1 c . . .
 H(14) H -0.160(5) 0.097(4) 0.8758(19) 0.084(16) Uiso 1.00 1 c . . .
 H(15) H -0.055(5) 0.212(4) 0.948(2) 0.085(16) Uiso 1.00 1 c . . .
 H(16) H 0.267(3) 0.193(2) 0.7294(12) 0.028(8) Uiso 1.00 1 c . . .
 H(17) H 0.428(3) 0.142(2) 0.7352(11) 0.012(6) Uiso 1.00 1 c . . .
 H(18) H 0.304(3) 0.308(3) 0.8078(13) 0.034(9) Uiso 1.00 1 c . . .
 H(19) H 0.443(2) 0.328(2) 0.7777(10) 0.007(6) Uiso 1.00 1 c . . .
 H(20) H 0.393(4) 0.116(3) 0.9617(15) 0.043(10) Uiso 1.00 1 c . . .
 H(21) H 0.516(2) 0.205(2) 0.9454(10) 0.006(6) Uiso 1.00 1 c . . .
 H(22) H 0.6506 -0.1745 0.9261 0.080 Uiso 1.00 1 c R . .
 H(23) H 0.6919 -0.1423 0.8677 0.080 Uiso 1.00 1 c R . .
 H(24) H 0.5582 -0.2221 0.8779 0.080 Uiso 1.00 1 c R . .


loop_
_atom_site_aniso_label
_atom_site_aniso_U_11
_atom_site_aniso_U_22
_atom_site_aniso_U_33
_atom_site_aniso_U_12
_atom_site_aniso_U_13
_atom_site_aniso_U_23
 Cl(1) 0.0341(4) 0.0347(4) 0.0262(3) -0.0036(3) 0.0088(3) 0.0006(3)
 Cl(2) 0.0556(5) 0.0442(5) 0.0421(5) 0.0069(4) 0.0205(4) -0.0110(4)
 S(1) 0.0287(4) 0.0364(5) 0.0267(3) 0.0010(3) -0.0024(3) 0.0041(3)
 S(2) 0.0274(4) 0.0382(5) 0.0282(4) -0.0036(3) -0.0000(3) -0.0036(3)
 O(1) 0.0168(10) 0.0442(14) 0.0323(11) 0.0008(9) 0.0045(8) -0.0028(10)
 O(2) 0.079(2) 0.0370(15) 0.0469(15) -0.0067(14) -0.0326(14) 0.0039(12)
 O(3) 0.0520(16) 0.0499(17) 0.0492(15) -0.0260(13) -0.0272(12) 0.0166(13)
 O(4) 0.0216(11) 0.0328(13) 0.0343(11) -0.0026(9) 0.0037(8) -0.0010(10)
 O(5) 0.0355(13) 0.0507(16) 0.0375(13) 0.0060(12) -0.0073(10) 0.0069(11)
 O(6) 0.0484(15) 0.0340(14) 0.0402(13) 0.0058(11) -0.0037(11) -0.0023(11)
 N(1) 0.0166(12) 0.0293(15) 0.0204(12) -0.0028(10) 0.0015(9) -0.0077(10)
 N(2) 0.0206(12) 0.0285(15) 0.0217(12) -0.0016(11) 0.0029(9) -0.0054(10)
 C(1) 0.0214(15) 0.0308(18) 0.0297(16) -0.0000(13) 0.0015(12) -0.0014(13)
 C(2) 0.0234(16) 0.033(2) 0.0391(18) 0.0070(14) -0.0043(13) 0.0004(15)
 C(3) 0.0150(16) 0.057(2) 0.055(2) 0.0017(16) 0.0035(15) -0.0146(19)
 C(4) 0.0256(16) 0.042(2) 0.041(2) -0.0067(15) 0.0147(15) -0.0181(17)
 C(5) 0.0270(15) 0.0199(16) 0.0262(15) -0.0019(12) 0.0056(12) -0.0049(12)
 C(6) 0.0191(14) 0.0213(16) 0.0246(14) -0.0011(12) 0.0019(11) -0.0040(12)
 C(7) 0.0297(17) 0.037(2) 0.0231(15) -0.0038(15) 0.0022(13) -0.0072(14)
 C(8) 0.0249(16) 0.0299(19) 0.0269(16) -0.0017(14) 0.0059(12) -0.0112(14)
 C(9) 0.0213(15) 0.0232(16) 0.0221(14) 0.0010(12) 0.0033(11) -0.0036(12)
 C(10) 0.0206(15) 0.0367(19) 0.0211(15) -0.0051(14) 0.0013(12) -0.0076(13)
 C(11) 0.0317(17) 0.0329(19) 0.0269(16) -0.0019(15) -0.0052(13) -0.0056(14)
 C(12) 0.107(4) 0.082(3) 0.074(3) -0.064(3) -0.046(3) 0.027(2)
 C(13) 0.0190(14) 0.040(2) 0.0282(15) -0.0003(14) 0.0025(11) 0.0076(14)
 C(14) 0.0222(16) 0.049(2) 0.0396(19) -0.0052(15) -0.0013(14) 0.0045(17)
 C(15) 0.0206(18) 0.065(2) 0.059(2) 0.0018(18) 0.0073(16) 0.014(2)
 C(16) 0.0299(18) 0.050(2) 0.054(2) 0.0110(17) 0.0206(17) 0.0063(19)
 C(17) 0.0313(17) 0.038(2) 0.0340(17) 0.0054(15) 0.0121(13) 0.0035(15)
 C(18) 0.0178(14) 0.040(2) 0.0253(15) 0.0038(13) 0.0077(11) 0.0067(14)
 C(19) 0.0269(16) 0.035(2) 0.0248(15) -0.0003(14) 0.0020(13) 0.0052(14)
 C(20) 0.0239(15) 0.0327(19) 0.0276(16) 0.0028(14) 0.0087(12) 0.0108(14)
 C(21) 0.0230(15) 0.0183(16) 0.0247(14) -0.0012(12) 0.0034(11) -0.0022(12)
 C(22) 0.0275(16) 0.039(2) 0.0230(15) -0.0056(15) 0.0013(12) -0.0036(14)
 C(23) 0.0236(16) 0.046(2) 0.0272(16) -0.0049(15) 0.0044(12) 0.0039(15)
 C(24) 0.089(3) 0.055(2) 0.056(2) 0.028(2) 0.009(2) -0.000(2)

#==============================================================================

_computing_data_collection            'PROCESS-AUTO'
_computing_cell_refinement            'PROCESS-AUTO'
_computing_data_reduction             'CrystalStructure'
_computing_structure_solution         'SIR92'
_computing_structure_refinement       'CRYSTALS'
_computing_publication_material       'CrystalStructure 3.8'
_computing_molecular_graphics          ?

#==============================================================================

# MOLECULAR GEOMETRY

_geom_special_details
;
    ENTER SPECIAL DETAILS OF THE MOLECULAR GEOMETRY
;

loop_
_geom_bond_atom_site_label_1
_geom_bond_atom_site_label_2
_geom_bond_distance
_geom_bond_publ_flag
_geom_bond_site_symmetry_1
_geom_bond_site_symmetry_2
Cl(1) C(5) 1.736(3) yes . .
Cl(2) C(17) 1.753(3) yes . .
S(1) C(1) 1.769(3) yes . .
S(1) C(7) 1.809(3) yes . .
S(2) C(13) 1.773(3) yes . .
S(2) C(19) 1.824(3) yes . .
O(1) C(9) 1.221(3) yes . .
O(2) C(11) 1.191(4) yes . .
O(3) C(11) 1.331(4) yes . .
O(3) C(12) 1.439(6) yes . .
O(4) C(21) 1.222(3) yes . .
O(5) C(23) 1.200(3) yes . .
O(6) C(23) 1.323(4) yes . .
N(1) C(6) 1.427(3) yes . .
N(1) C(9) 1.383(3) yes . .
N(1) C(10) 1.459(3) yes . .
N(2) C(18) 1.425(3) yes . .
N(2) C(21) 1.371(3) yes . .
N(2) C(22) 1.457(3) yes . .
C(1) C(2) 1.392(4) yes . .
C(1) C(6) 1.410(4) yes . .
C(2) C(3) 1.387(5) yes . .
C(3) C(4) 1.373(5) yes . .
C(4) C(5) 1.384(4) yes . .
C(5) C(6) 1.404(4) yes . .
C(7) C(8) 1.522(4) yes . .
C(8) C(9) 1.500(4) yes . .
C(10) C(11) 1.511(4) yes . .
C(13) C(14) 1.395(4) yes . .
C(13) C(18) 1.405(4) yes . .
C(14) C(15) 1.385(5) yes . .
C(15) C(16) 1.373(6) yes . .
C(16) C(17) 1.382(4) yes . .
C(17) C(18) 1.395(4) yes . .
C(19) C(20) 1.525(4) yes . .
C(20) C(21) 1.511(4) yes . .
C(22) C(23) 1.497(5) yes . .
C(2) H(1) 0.99(3) no . .
C(3) H(2) 0.90(4) no . .
C(4) H(3) 0.91(2) no . .
C(7) H(4) 1.03(3) no . .
C(7) H(5) 0.97(2) no . .
C(8) H(6) 0.95(3) no . .
C(8) H(7) 1.01(2) no . .
C(10) H(8) 0.95(3) no . .
C(10) H(9) 0.97(3) no . .
C(12) H(10) 0.950 no . .
C(12) H(11) 0.950 no . .
C(12) H(12) 0.950 no . .
C(14) H(13) 1.02(3) no . .
C(15) H(14) 0.92(5) no . .
C(16) H(15) 0.96(5) no . .
C(19) H(16) 0.98(3) no . .
C(19) H(17) 0.97(2) no . .
C(20) H(18) 0.97(3) no . .
C(20) H(19) 1.02(2) no . .
C(24) H(22) 0.950 no . .
C(24) H(23) 0.950 no . .
C(24) H(24) 0.950 no . .

loop_
_geom_angle_atom_site_label_1
_geom_angle_atom_site_label_2
_geom_angle_atom_site_label_3
_geom_angle
_geom_angle_publ_flag
_geom_angle_site_symmetry_1
_geom_angle_site_symmetry_2
_geom_angle_site_symmetry_3
C(1) S(1) C(7) 100.63(15) yes . . .
C(13) S(2) C(19) 100.97(16) yes . . .
C(11) O(3) C(12) 115.7(3) yes . . .
C(23) O(6) C(24) 114.5(2) yes . . .
C(6) N(1) C(9) 122.4(2) yes . . .
C(6) N(1) C(10) 120.0(2) yes . . .
C(9) N(1) C(10) 117.0(2) yes . . .
C(18) N(2) C(21) 122.8(2) yes . . .
C(18) N(2) C(22) 119.9(2) yes . . .
C(21) N(2) C(22) 116.9(2) yes . . .
S(1) C(1) C(2) 119.2(2) yes . . .
S(1) C(1) C(6) 121.2(2) yes . . .
C(2) C(1) C(6) 119.5(2) yes . . .
C(1) C(2) C(3) 121.0(3) yes . . .
C(2) C(3) C(4) 119.8(3) yes . . .
C(3) C(4) C(5) 120.2(3) yes . . .
Cl(1) C(5) C(4) 117.9(2) yes . . .
Cl(1) C(5) C(6) 120.9(2) yes . . .
C(4) C(5) C(6) 121.1(2) yes . . .
N(1) C(6) C(1) 121.2(2) yes . . .
N(1) C(6) C(5) 120.6(2) yes . . .
C(1) C(6) C(5) 118.1(2) yes . . .
S(1) C(7) C(8) 112.7(2) yes . . .
C(7) C(8) C(9) 112.5(2) yes . . .
O(1) C(9) N(1) 120.3(2) yes . . .
O(1) C(9) C(8) 122.6(2) yes . . .
N(1) C(9) C(8) 117.1(2) yes . . .
N(1) C(10) C(11) 114.0(2) yes . . .
O(2) C(11) O(3) 125.1(3) yes . . .
O(2) C(11) C(10) 127.1(3) yes . . .
O(3) C(11) C(10) 107.8(2) yes . . .
S(2) C(13) C(14) 117.9(2) yes . . .
S(2) C(13) C(18) 121.9(2) yes . . .
C(14) C(13) C(18) 120.1(2) yes . . .
C(13) C(14) C(15) 120.5(3) yes . . .
C(14) C(15) C(16) 120.3(3) yes . . .
C(15) C(16) C(17) 119.1(3) yes . . .
Cl(2) C(17) C(16) 117.5(2) yes . . .
Cl(2) C(17) C(18) 119.7(2) yes . . .
C(16) C(17) C(18) 122.6(3) yes . . .
N(2) C(18) C(13) 121.6(2) yes . . .
N(2) C(18) C(17) 121.1(2) yes . . .
C(13) C(18) C(17) 117.3(2) yes . . .
S(2) C(19) C(20) 112.5(2) yes . . .
C(19) C(20) C(21) 113.6(2) yes . . .
O(4) C(21) N(2) 120.2(2) yes . . .
O(4) C(21) C(20) 123.2(2) yes . . .
N(2) C(21) C(20) 116.6(2) yes . . .
N(2) C(22) C(23) 118.1(2) yes . . .
O(5) C(23) O(6) 125.0(3) yes . . .
O(5) C(23) C(22) 121.4(3) yes . . .
O(6) C(23) C(22) 113.4(2) yes . . .
C(1) C(2) H(1) 113.1(18) no . . .
C(3) C(2) H(1) 125.9(18) no . . .
C(2) C(3) H(2) 119(2) no . . .
C(4) C(3) H(2) 121(2) no . . .
C(3) C(4) H(3) 120.2(18) no . . .
C(5) C(4) H(3) 119.5(18) no . . .
S(1) C(7) H(4) 109.9(18) no . . .
S(1) C(7) H(5) 106.0(17) no . . .
C(8) C(7) H(4) 112.3(18) no . . .
C(8) C(7) H(5) 109.1(17) no . . .
H(4) C(7) H(5) 106(2) no . . .
C(7) C(8) H(6) 112.5(18) no . . .
C(7) C(8) H(7) 110.7(15) no . . .
C(9) C(8) H(6) 107.4(18) no . . .
C(9) C(8) H(7) 109.0(15) no . . .
H(6) C(8) H(7) 104(2) no . . .
N(1) C(10) H(8) 105(2) no . . .
N(1) C(10) H(9) 113.0(17) no . . .
C(11) C(10) H(8) 116(2) no . . .
C(11) C(10) H(9) 104.7(18) no . . .
H(8) C(10) H(9) 103(2) no . . .
O(3) C(12) H(10) 109.2 no . . .
O(3) C(12) H(11) 110.1 no . . .
O(3) C(12) H(12) 109.1 no . . .
H(10) C(12) H(11) 109.5 no . . .
H(10) C(12) H(12) 109.5 no . . .
H(11) C(12) H(12) 109.5 no . . .
C(13) C(14) H(13) 115(2) no . . .
C(15) C(14) H(13) 125(2) no . . .
C(14) C(15) H(14) 121(3) no . . .
C(16) C(15) H(14) 118(3) no . . .
C(15) C(16) H(15) 126(3) no . . .
C(17) C(16) H(15) 115(3) no . . .
S(2) C(19) H(16) 108.2(19) no . . .
S(2) C(19) H(17) 107.0(17) no . . .
C(20) C(19) H(16) 110.6(19) no . . .
C(20) C(19) H(17) 107.7(17) no . . .
H(16) C(19) H(17) 111(2) no . . .
C(19) C(20) H(18) 114(2) no . . .
C(19) C(20) H(19) 111.3(14) no . . .
C(21) C(20) H(18) 107.6(19) no . . .
C(21) C(20) H(19) 108.9(14) no . . .
H(18) C(20) H(19) 101(2) no . . .
N(2) C(22) H(20) 108(2) no . . .
N(2) C(22) H(21) 105.5(16) no . . .
C(23) C(22) H(20) 107(2) no . . .
C(23) C(22) H(21) 108.8(16) no . . .
H(20) C(22) H(21) 109(2) no . . .
O(6) C(24) H(22) 109.9 no . . .
O(6) C(24) H(23) 109.4 no . . .
O(6) C(24) H(24) 109.1 no . . .
H(22) C(24) H(23) 109.5 no . . .
H(22) C(24) H(24) 109.5 no . . .
H(23) C(24) H(24) 109.5 no . . .

loop_
_geom_torsion_atom_site_label_1
_geom_torsion_atom_site_label_2
_geom_torsion_atom_site_label_3
_geom_torsion_atom_site_label_4
_geom_torsion
_geom_torsion_publ_flag
_geom_torsion_site_symmetry_1
_geom_torsion_site_symmetry_2
_geom_torsion_site_symmetry_3
_geom_torsion_site_symmetry_4
C(1) S(1) C(7) C(8) -40.7(2) ? . . . .
C(7) S(1) C(1) C(2) -112.4(2) ? . . . .
C(7) S(1) C(1) C(6) 68.6(2) ? . . . .
C(13) S(2) C(19) C(20) 40.2(2) ? . . . .
C(19) S(2) C(13) C(14) 115.6(2) ? . . . .
C(19) S(2) C(13) C(18) -66.0(3) ? . . . .
C(12) O(3) C(11) O(2) 1.2(5) ? . . . .
C(12) O(3) C(11) C(10) -176.2(3) ? . . . .
C(24) O(6) C(23) O(5) -0.3(5) ? . . . .
C(24) O(6) C(23) C(22) -176.0(3) ? . . . .
C(6) N(1) C(9) O(1) 169.6(2) ? . . . .
C(6) N(1) C(9) C(8) -11.3(4) ? . . . .
C(9) N(1) C(6) C(1) -48.2(4) ? . . . .
C(9) N(1) C(6) C(5) 129.8(3) ? . . . .
C(6) N(1) C(10) C(11) -91.3(3) ? . . . .
C(10) N(1) C(6) C(1) 121.8(3) ? . . . .
C(10) N(1) C(6) C(5) -60.1(3) ? . . . .
C(9) N(1) C(10) C(11) 79.3(3) ? . . . .
C(10) N(1) C(9) O(1) -0.7(4) ? . . . .
C(10) N(1) C(9) C(8) 178.3(2) ? . . . .
C(18) N(2) C(21) O(4) -169.9(2) ? . . . .
C(18) N(2) C(21) C(20) 11.7(4) ? . . . .
C(21) N(2) C(18) C(13) 49.2(4) ? . . . .
C(21) N(2) C(18) C(17) -131.9(3) ? . . . .
C(18) N(2) C(22) C(23) 110.0(3) ? . . . .
C(22) N(2) C(18) C(13) -123.6(3) ? . . . .
C(22) N(2) C(18) C(17) 55.3(4) ? . . . .
C(21) N(2) C(22) C(23) -63.2(4) ? . . . .
C(22) N(2) C(21) O(4) 3.1(4) ? . . . .
C(22) N(2) C(21) C(20) -175.3(2) ? . . . .
S(1) C(1) C(2) C(3) -176.6(2) ? . . . .
S(1) C(1) C(6) N(1) -1.2(4) ? . . . .
S(1) C(1) C(6) C(5) -179.3(2) ? . . . .
C(2) C(1) C(6) N(1) 179.8(2) ? . . . .
C(2) C(1) C(6) C(5) 1.7(4) ? . . . .
C(6) C(1) C(2) C(3) 2.4(5) ? . . . .
C(1) C(2) C(3) C(4) -3.7(5) ? . . . .
C(2) C(3) C(4) C(5) 0.8(5) ? . . . .
C(3) C(4) C(5) Cl(1) -174.3(3) ? . . . .
C(3) C(4) C(5) C(6) 3.4(5) ? . . . .
Cl(1) C(5) C(6) N(1) -5.0(4) ? . . . .
Cl(1) C(5) C(6) C(1) 173.1(2) ? . . . .
C(4) C(5) C(6) N(1) 177.3(3) ? . . . .
C(4) C(5) C(6) C(1) -4.6(4) ? . . . .
S(1) C(7) C(8) C(9) -42.8(3) ? . . . .
C(7) C(8) C(9) O(1) -93.7(3) ? . . . .
C(7) C(8) C(9) N(1) 87.3(3) ? . . . .
N(1) C(10) C(11) O(2) 18.9(4) ? . . . .
N(1) C(10) C(11) O(3) -163.8(2) ? . . . .
S(2) C(13) C(14) C(15) 178.3(3) ? . . . .
S(2) C(13) C(18) N(2) -1.4(4) ? . . . .
S(2) C(13) C(18) C(17) 179.6(2) ? . . . .
C(14) C(13) C(18) N(2) 177.0(3) ? . . . .
C(14) C(13) C(18) C(17) -2.0(4) ? . . . .
C(18) C(13) C(14) C(15) -0.2(4) ? . . . .
C(13) C(14) C(15) C(16) 1.6(6) ? . . . .
C(14) C(15) C(16) C(17) -0.8(6) ? . . . .
C(15) C(16) C(17) Cl(2) 174.8(3) ? . . . .
C(15) C(16) C(17) C(18) -1.5(6) ? . . . .
Cl(2) C(17) C(18) N(2) 7.7(4) ? . . . .
Cl(2) C(17) C(18) C(13) -173.3(2) ? . . . .
C(16) C(17) C(18) N(2) -176.1(3) ? . . . .
C(16) C(17) C(18) C(13) 2.9(5) ? . . . .
S(2) C(19) C(20) C(21) 42.3(3) ? . . . .
C(19) C(20) C(21) O(4) 94.5(3) ? . . . .
C(19) C(20) C(21) N(2) -87.2(3) ? . . . .
N(2) C(22) C(23) O(5) 156.0(3) ? . . . .
N(2) C(22) C(23) O(6) -28.1(4) ? . . . .

loop_
_geom_contact_atom_site_label_1
_geom_contact_atom_site_label_2
_geom_contact_distance
_geom_contact_publ_flag
_geom_contact_site_symmetry_1
_geom_contact_site_symmetry_2
Cl(1) O(3) 3.008(2) ? . 3_767
S(1) O(4) 3.449(2) ? . 2_656
S(2) O(1) 3.365(2) ? . 2_646
O(1) S(2) 3.365(2) ? . 2_656
O(1) C(3) 3.417(4) ? . 1_655
O(1) C(17) 3.468(4) ? . 1_655
O(1) C(19) 3.309(4) ? . 2_656
O(1) C(20) 3.535(3) ? . 1_655
O(2) C(19) 3.513(4) ? . 2_656
O(3) Cl(1) 3.008(2) ? . 3_767
O(4) S(1) 3.449(2) ? . 2_646
O(4) C(4) 3.593(4) ? . .
O(4) C(5) 3.382(3) ? . .
O(4) C(6) 3.558(3) ? . .
O(4) C(8) 3.459(3) ? . .
O(4) C(15) 3.430(4) ? . 1_655
O(5) C(12) 3.519(5) ? . 3_767
O(5) C(15) 3.537(4) ? . 1_655
O(5) C(22) 3.318(4) ? . 3_657
O(5) C(23) 3.462(4) ? . 3_657
O(5) C(24) 2.636(5) ? . .
O(6) C(12) 3.544(6) ? . 1_445
O(6) C(24) 1.452(5) ? . .
C(2) C(20) 3.583(4) ? . .
C(3) O(1) 3.417(4) ? . 1_455
C(3) C(20) 3.548(5) ? . .
C(3) C(21) 3.585(5) ? . .
C(4) O(4) 3.593(4) ? . .
C(4) C(21) 3.527(4) ? . .
C(5) O(4) 3.382(3) ? . .
C(6) O(4) 3.558(3) ? . .
C(8) O(4) 3.459(3) ? . .
C(8) C(15) 3.569(5) ? . 1_655
C(9) C(16) 3.561(5) ? . 1_655
C(12) O(5) 3.519(5) ? . 3_767
C(12) O(6) 3.544(6) ? . 1_665
C(12) C(13) 3.486(6) ? . 1_665
C(13) C(12) 3.486(6) ? . 1_445
C(15) O(4) 3.430(4) ? . 1_455
C(15) O(5) 3.537(4) ? . 1_455
C(15) C(8) 3.569(5) ? . 1_455
C(16) C(9) 3.561(5) ? . 1_455
C(17) O(1) 3.468(4) ? . 1_455
C(19) O(1) 3.309(4) ? . 2_646
C(19) O(2) 3.513(4) ? . 2_646
C(20) O(1) 3.535(3) ? . 1_455
C(20) C(2) 3.583(4) ? . .
C(20) C(3) 3.548(5) ? . .
C(21) C(3) 3.585(5) ? . .
C(21) C(4) 3.527(4) ? . .
C(22) O(5) 3.318(4) ? . 3_657
C(23) O(5) 3.462(4) ? . 3_657
C(23) C(24) 2.335(6) ? . .
C(24) O(5) 2.636(5) ? . .
C(24) O(6) 1.452(5) ? . .
C(24) C(23) 2.335(6) ? . .
Cl(1) H(3) 3.08(2) ? . 3_667
Cl(1) H(9) 3.25(2) ? . 3_767
Cl(1) H(12) 3.537 ? . 3_767
Cl(1) H(15) 2.97(5) ? . 1_655
Cl(1) H(21) 3.04(2) ? . .
Cl(2) H(3) 3.03(2) ? . .
Cl(2) H(8) 2.87(3) ? . 3_667
Cl(2) H(9) 2.99(3) ? . 1_455
Cl(2) H(20) 2.64(3) ? . .
Cl(2) H(21) 3.11(2) ? . .
Cl(2) H(22) 3.181 ? . 3_657
S(1) H(4) 3.46(3) ? . 2_656
S(1) H(6) 3.32(3) ? . 2_656
S(1) H(7) 3.16(2) ? . 2_656
S(1) H(13) 3.01(3) ? . 2_556
S(1) H(17) 2.96(2) ? . 2_656
S(2) H(1) 3.08(3) ? . 2_546
S(2) H(5) 3.02(2) ? . 2_646
S(2) H(11) 3.532 ? . 1_445
S(2) H(18) 3.44(3) ? . 2_546
S(2) H(19) 3.38(2) ? . 2_546
O(1) H(2) 2.67(4) ? . 1_655
O(1) H(16) 3.41(3) ? . 2_656
O(1) H(17) 2.76(2) ? . 2_656
O(1) H(18) 2.57(3) ? . 1_655
O(2) H(4) 3.46(3) ? . 2_656
O(2) H(13) 3.38(4) ? . 1_665
O(2) H(16) 3.40(3) ? . 2_656
O(2) H(17) 2.85(2) ? . 2_656
O(2) H(22) 3.558 ? . 1_565
O(2) H(23) 2.925 ? . 1_565
O(3) H(2) 3.23(4) ? . 1_655
O(3) H(15) 3.15(5) ? . 3_667
O(4) H(5) 3.22(2) ? . 2_646
O(4) H(6) 2.51(3) ? . .
O(4) H(14) 2.68(5) ? . 1_655
O(4) H(21) 2.57(2) ? . .
O(5) H(12) 2.584 ? . 3_767
O(5) H(14) 2.89(5) ? . 1_655
O(5) H(15) 3.43(5) ? . 1_655
O(5) H(20) 2.73(3) ? . .
O(5) H(20) 2.46(3) ? . 3_657
O(5) H(21) 2.50(2) ? . .
O(5) H(22) 2.301 ? . .
O(5) H(23) 2.955 ? . .
O(5) H(24) 3.493 ? . .
O(6) H(5) 2.98(2) ? . 2_646
O(6) H(11) 2.791 ? . 1_445
O(6) H(12) 3.483 ? . 1_445
O(6) H(14) 3.38(5) ? . 1_655
O(6) H(20) 2.80(3) ? . .
O(6) H(21) 3.09(2) ? . .
O(6) H(22) 1.987 ? . .
O(6) H(23) 1.982 ? . .
O(6) H(24) 1.978 ? . .
N(2) H(20) 2.00(3) ? . .
N(2) H(21) 1.94(2) ? . .
C(1) H(13) 3.50(4) ? . 2_556
C(1) H(19) 3.40(2) ? . .
C(1) H(23) 3.559 ? . 1_565
C(1) H(24) 3.006 ? . 1_565
C(2) H(13) 3.22(4) ? . 2_556
C(2) H(16) 3.28(3) ? . 2_556
C(2) H(18) 3.43(3) ? . .
C(2) H(19) 2.89(2) ? . .
C(2) H(24) 2.771 ? . 1_565
C(3) H(16) 3.57(3) ? . 2_556
C(3) H(18) 3.16(3) ? . .
C(3) H(19) 3.22(2) ? . .
C(3) H(24) 2.947 ? . 1_565
C(4) H(3) 3.53(2) ? . 3_667
C(4) H(21) 3.21(2) ? . .
C(4) H(24) 3.374 ? . 1_565
C(5) H(21) 3.31(2) ? . .
C(6) H(24) 3.421 ? . 1_565
C(7) H(13) 3.27(3) ? . 2_556
C(7) H(17) 3.14(2) ? . 2_656
C(7) H(23) 3.018 ? . 2_656
C(8) H(17) 3.57(2) ? . 2_656
C(9) H(17) 3.01(2) ? . 2_656
C(9) H(18) 3.56(3) ? . 1_655
C(11) H(2) 3.45(4) ? . 1_655
C(11) H(17) 3.41(2) ? . 2_656
C(12) H(15) 3.46(5) ? . 3_667
C(13) H(1) 3.45(3) ? . 2_546
C(13) H(7) 3.49(2) ? . 1_455
C(13) H(10) 2.903 ? . 1_445
C(13) H(11) 3.266 ? . 1_445
C(14) H(1) 3.16(3) ? . 2_546
C(14) H(4) 3.43(3) ? . 2_546
C(14) H(7) 3.03(2) ? . 1_455
C(14) H(10) 2.778 ? . 1_445
C(15) H(6) 3.18(3) ? . 1_455
C(15) H(7) 3.19(2) ? . 1_455
C(15) H(10) 3.011 ? . 1_445
C(16) H(10) 3.356 ? . 1_445
C(17) H(9) 3.59(3) ? . 1_455
C(17) H(10) 3.455 ? . 1_445
C(17) H(20) 2.71(3) ? . .
C(17) H(21) 3.53(2) ? . .
C(18) H(10) 3.247 ? . 1_445
C(18) H(11) 3.539 ? . 1_445
C(18) H(20) 2.50(3) ? . .
C(18) H(21) 3.10(2) ? . .
C(19) H(1) 3.24(3) ? . 2_546
C(19) H(5) 3.21(2) ? . 2_646
C(21) H(5) 3.41(2) ? . 2_646
C(21) H(6) 3.51(3) ? . .
C(21) H(20) 3.21(3) ? . .
C(21) H(21) 2.57(2) ? . .
C(22) H(20) 0.98(3) ? . .
C(22) H(21) 0.94(2) ? . .
C(23) H(12) 3.593 ? . 3_767
C(23) H(14) 3.04(5) ? . 1_655
C(23) H(20) 2.02(3) ? . .
C(23) H(20) 3.15(3) ? . 3_657
C(23) H(21) 2.01(2) ? . .
C(23) H(22) 2.406 ? . .
C(23) H(23) 2.759 ? . .
C(23) H(24) 3.078 ? . .
C(24) H(4) 3.19(3) ? . 2_646
C(24) H(5) 3.17(2) ? . 2_646
C(24) H(11) 3.329 ? . 1_445
C(24) H(14) 3.52(5) ? . 1_655
H(1) S(2) 3.08(3) ? . 2_556
H(1) C(13) 3.45(3) ? . 2_556
H(1) C(14) 3.16(3) ? . 2_556
H(1) C(19) 3.24(3) ? . 2_556
H(1) H(7) 3.02(4) ? . 2_656
H(1) H(13) 2.49(5) ? . 2_556
H(1) H(16) 2.57(4) ? . 2_556
H(1) H(18) 3.54(4) ? . .
H(1) H(19) 2.93(4) ? . .
H(1) H(24) 3.090 ? . 1_565
H(2) O(1) 2.67(4) ? . 1_455
H(2) O(3) 3.23(4) ? . 1_455
H(2) C(11) 3.45(4) ? . 1_455
H(2) H(9) 3.04(5) ? . 1_455
H(2) H(11) 3.422 ? . 1_455
H(2) H(16) 3.11(5) ? . 2_556
H(2) H(18) 3.05(5) ? . .
H(2) H(19) 3.45(5) ? . .
H(2) H(24) 3.270 ? . 1_565
H(3) Cl(1) 3.08(2) ? . 3_667
H(3) Cl(2) 3.03(2) ? . .
H(3) C(4) 3.53(2) ? . 3_667
H(3) H(3) 2.95(4) ? . 3_667
H(3) H(21) 2.96(4) ? . .
H(4) S(1) 3.46(3) ? . 2_646
H(4) O(2) 3.46(3) ? . 2_646
H(4) C(14) 3.43(3) ? . 2_556
H(4) C(24) 3.19(3) ? . 2_656
H(4) H(13) 2.64(5) ? . 2_556
H(4) H(14) 3.32(5) ? . 2_556
H(4) H(19) 3.33(4) ? . .
H(4) H(23) 2.377 ? . 2_656
H(4) H(24) 3.403 ? . 2_656
H(5) S(2) 3.02(2) ? . 2_656
H(5) O(4) 3.22(2) ? . 2_656
H(5) O(6) 2.98(2) ? . 2_656
H(5) C(19) 3.21(2) ? . 2_656
H(5) C(21) 3.41(2) ? . 2_656
H(5) C(24) 3.17(2) ? . 2_656
H(5) H(17) 2.64(4) ? . 2_656
H(5) H(23) 2.723 ? . 2_656
H(5) H(24) 3.301 ? . 2_656
H(6) S(1) 3.32(3) ? . 2_646
H(6) O(4) 2.51(3) ? . .
H(6) C(15) 3.18(3) ? . 1_655
H(6) C(21) 3.51(3) ? . .
H(6) H(14) 3.07(5) ? . 1_655
H(6) H(19) 3.43(4) ? . .
H(7) S(1) 3.16(2) ? . 2_646
H(7) C(13) 3.49(2) ? . 1_655
H(7) C(14) 3.03(2) ? . 1_655
H(7) C(15) 3.19(2) ? . 1_655
H(7) H(1) 3.02(4) ? . 2_646
H(7) H(13) 3.19(5) ? . 1_655
H(7) H(14) 3.43(5) ? . 1_655
H(7) H(16) 3.53(4) ? . 1_655
H(7) H(18) 3.44(4) ? . 1_655
H(8) Cl(2) 2.87(3) ? . 3_667
H(8) H(8) 3.29(5) ? . 3_767
H(8) H(9) 3.25(4) ? . 3_767
H(9) Cl(1) 3.25(2) ? . 3_767
H(9) Cl(2) 2.99(3) ? . 1_655
H(9) C(17) 3.59(3) ? . 1_655
H(9) H(2) 3.04(5) ? . 1_655
H(9) H(8) 3.25(4) ? . 3_767
H(9) H(15) 3.59(5) ? . 1_655
H(10) C(13) 2.903 ? . 1_665
H(10) C(14) 2.778 ? . 1_665
H(10) C(15) 3.011 ? . 1_665
H(10) C(16) 3.356 ? . 1_665
H(10) C(17) 3.455 ? . 1_665
H(10) C(18) 3.247 ? . 1_665
H(10) H(13) 3.186 ? . 1_665
H(10) H(14) 3.463 ? . 1_665
H(11) S(2) 3.532 ? . 1_665
H(11) O(6) 2.791 ? . 1_665
H(11) C(13) 3.266 ? . 1_665
H(11) C(18) 3.539 ? . 1_665
H(11) C(24) 3.329 ? . 1_665
H(11) H(2) 3.422 ? . 1_655
H(11) H(24) 2.938 ? . 1_665
H(12) Cl(1) 3.537 ? . 3_767
H(12) O(5) 2.584 ? . 3_767
H(12) O(6) 3.483 ? . 1_665
H(12) C(23) 3.593 ? . 3_767
H(12) H(15) 2.940 ? . 3_667
H(12) H(20) 3.174 ? . 1_665
H(12) H(21) 3.549 ? . 3_767
H(13) S(1) 3.01(3) ? . 2_546
H(13) O(2) 3.38(4) ? . 1_445
H(13) C(1) 3.50(4) ? . 2_546
H(13) C(2) 3.22(4) ? . 2_546
H(13) C(7) 3.27(3) ? . 2_546
H(13) H(1) 2.49(5) ? . 2_546
H(13) H(4) 2.64(5) ? . 2_546
H(13) H(7) 3.19(5) ? . 1_455
H(13) H(10) 3.186 ? . 1_445
H(13) H(19) 3.00(4) ? . 2_546
H(14) O(4) 2.68(5) ? . 1_455
H(14) O(5) 2.89(5) ? . 1_455
H(14) O(6) 3.38(5) ? . 1_455
H(14) C(23) 3.04(5) ? . 1_455
H(14) C(24) 3.52(5) ? . 1_455
H(14) H(4) 3.32(5) ? . 2_546
H(14) H(6) 3.07(5) ? . 1_455
H(14) H(7) 3.43(5) ? . 1_455
H(14) H(10) 3.463 ? . 1_445
H(14) H(23) 2.985 ? . 1_455
H(15) Cl(1) 2.97(5) ? . 1_455
H(15) O(3) 3.15(5) ? . 3_667
H(15) O(5) 3.43(5) ? . 1_455
H(15) C(12) 3.46(5) ? . 3_667
H(15) H(9) 3.59(5) ? . 1_455
H(15) H(12) 2.940 ? . 3_667
H(16) O(1) 3.41(3) ? . 2_646
H(16) O(2) 3.40(3) ? . 2_646
H(16) C(2) 3.28(3) ? . 2_546
H(16) C(3) 3.57(3) ? . 2_546
H(16) H(1) 2.57(4) ? . 2_546
H(16) H(2) 3.11(5) ? . 2_546
H(16) H(7) 3.53(4) ? . 1_455
H(17) S(1) 2.96(2) ? . 2_646
H(17) O(1) 2.76(2) ? . 2_646
H(17) O(2) 2.85(2) ? . 2_646
H(17) C(7) 3.14(2) ? . 2_646
H(17) C(8) 3.57(2) ? . 2_646
H(17) C(9) 3.01(2) ? . 2_646
H(17) C(11) 3.41(2) ? . 2_646
H(17) H(5) 2.64(4) ? . 2_646
H(18) S(2) 3.44(3) ? . 2_556
H(18) O(1) 2.57(3) ? . 1_455
H(18) C(2) 3.43(3) ? . .
H(18) C(3) 3.16(3) ? . .
H(18) C(9) 3.56(3) ? . 1_455
H(18) H(1) 3.54(4) ? . .
H(18) H(2) 3.05(5) ? . .
H(18) H(7) 3.44(4) ? . 1_455
H(19) S(2) 3.38(2) ? . 2_556
H(19) C(1) 3.40(2) ? . .
H(19) C(2) 2.89(2) ? . .
H(19) C(3) 3.22(2) ? . .
H(19) H(1) 2.93(4) ? . .
H(19) H(2) 3.45(5) ? . .
H(19) H(4) 3.33(4) ? . .
H(19) H(6) 3.43(4) ? . .
H(19) H(13) 3.00(4) ? . 2_556
H(20) Cl(2) 2.64(3) ? . .
H(20) O(5) 2.73(3) ? . .
H(20) O(5) 2.46(3) ? . 3_657
H(20) O(6) 2.80(3) ? . .
H(20) N(2) 2.00(3) ? . .
H(20) C(17) 2.71(3) ? . .
H(20) C(18) 2.50(3) ? . .
H(20) C(21) 3.21(3) ? . .
H(20) C(22) 0.98(3) ? . .
H(20) C(23) 2.02(3) ? . .
H(20) C(23) 3.15(3) ? . 3_657
H(20) H(12) 3.174 ? . 1_445
H(20) H(21) 1.57(4) ? . .
H(20) H(22) 2.902 ? . 3_657
H(21) Cl(1) 3.04(2) ? . .
H(21) Cl(2) 3.11(2) ? . .
H(21) O(4) 2.57(2) ? . .
H(21) O(5) 2.50(2) ? . .
H(21) O(6) 3.09(2) ? . .
H(21) N(2) 1.94(2) ? . .
H(21) C(4) 3.21(2) ? . .
H(21) C(5) 3.31(2) ? . .
H(21) C(17) 3.53(2) ? . .
H(21) C(18) 3.10(2) ? . .
H(21) C(21) 2.57(2) ? . .
H(21) C(22) 0.94(2) ? . .
H(21) C(23) 2.01(2) ? . .
H(21) H(3) 2.96(4) ? . .
H(21) H(12) 3.549 ? . 3_767
H(21) H(20) 1.57(4) ? . .
H(22) Cl(2) 3.181 ? . 3_657
H(22) O(2) 3.558 ? . 1_545
H(22) O(5) 2.301 ? . .
H(22) O(6) 1.987 ? . .
H(22) C(23) 2.406 ? . .
H(22) H(20) 2.902 ? . 3_657
H(22) H(23) 1.551 ? . .
H(22) H(24) 1.551 ? . .
H(23) O(2) 2.925 ? . 1_545
H(23) O(5) 2.955 ? . .
H(23) O(6) 1.982 ? . .
H(23) C(1) 3.559 ? . 1_545
H(23) C(7) 3.018 ? . 2_646
H(23) C(23) 2.759 ? . .
H(23) H(4) 2.377 ? . 2_646
H(23) H(5) 2.723 ? . 2_646
H(23) H(14) 2.985 ? . 1_655
H(23) H(22) 1.551 ? . .
H(23) H(24) 1.551 ? . .
H(24) O(5) 3.493 ? . .
H(24) O(6) 1.978 ? . .
H(24) C(1) 3.006 ? . 1_545
H(24) C(2) 2.771 ? . 1_545
H(24) C(3) 2.947 ? . 1_545
H(24) C(4) 3.374 ? . 1_545
H(24) C(6) 3.421 ? . 1_545
H(24) C(23) 3.078 ? . .
H(24) H(1) 3.090 ? . 1_545
H(24) H(2) 3.270 ? . 1_545
H(24) H(4) 3.403 ? . 2_646
H(24) H(5) 3.301 ? . 2_646
H(24) H(11) 2.938 ? . 1_445
H(24) H(22) 1.551 ? . .
H(24) H(23) 1.551 ? . .


#==============================================================================

# Additional structures and associated data_? identifiers
# should be added at this point if there is more than one 
# structure analysis in the CIF.

#==============================================================================

#     End of CIF

#==============================================================================
